# 1 Long-range single-molecule mapping of chromatin modification in eukaryotes

2 Zhe Weng<sup>2,\*</sup>, Fengying Ruan<sup>2,\*</sup>, Weitian Chen<sup>1,2,\*</sup>, Zhe Xie<sup>2,3</sup>, Yeming Xie<sup>2</sup>, Chen Zhang<sup>2</sup>,  
3 Zhichao Chen<sup>1,2</sup>, Juan Wang<sup>2</sup>, Yuxin Sun<sup>2</sup>, Yitong Fang<sup>2</sup>, Mei Guo<sup>2</sup>, Yiqin Tong<sup>2</sup>, Yaning  
4 Li<sup>2</sup>, Chong Tang<sup>2,4,5</sup>

5  
6 <sup>1</sup>. College of Life Sciences, University of Chinese Academy of Sciences, Beijing 100049,  
7 China

8 <sup>2</sup>. BGI Genomics, BGI-Shenzhen, Shenzhen 518083, China

9 <sup>3</sup>. Department of Biology, Cell Biology and Physiology, University of Copenhagen 13,  
10 2100 Copenhagen, Denmark

11 <sup>4</sup>. Nantong University, Nantong, China, 226000

12 <sup>5</sup>. Nephrosis Precision Medicine Innovation Center, University of Beihua School of  
13 Medicine, Jilin 132011, China

14 \* These authors contributed equally to this work.

15

16 Keywords: histone, H3K27me3, CTCF, methylation, m<sup>6</sup>A, methyltransferase

17

18 *Running title: long-range profiling of H3K27me3 reveal the heterogenous histone*  
19 *modification*

20

21 Correspondence:

22 Chong Tang

23 Director of technology, BGI Shenzhen, China

24 Phone: 8618025420976

25 Email: [tangchong@bgi.com](mailto:tangchong@bgi.com)

26

27

28

29

30

31

32

## 1 **Abstract**

2 The epigenetic modifications of histones are essential markers related to the  
3 development and pathogenesis of diseases, including human cancers. Mapping histone  
4 modification has emerged as the widely used tool for studying epigenetic regulation.  
5 However, existing approaches are limited by fragmentation and short-read sequencing  
6 represent the average chromatin status in samples and cannot provide information  
7 about the long-range chromatin states. We leveraged the advantage of long read  
8 sequencing to develop a method "BIND&MODIFY" for profiling the histone modification  
9 of individual DNA fibers. Our approach is based on the recombinant fused protein A-  
10 M.EcoGII, which tethers the methyltransferase M.EcoGII to the protein binding sites and  
11 locally labels the neighboring DNA regions through artificial methylations. We  
12 demonstrated that the aggregated BIND&MODIFY signal matches the bulk-level ChIP-  
13 seq and CUT&TAG, verify the single-molecule heterogenous histone modification  
14 status, and quantify the correlation between distal elements. This method could be an  
15 essential tool in future third-generation sequencing ages.

16

17

18

19

20

21

22

23

## 1 **Introduction**

2 The genome in each cell of a multi-cellular organism is identical and stays reasonably  
3 static, whereas the epigenome is very dynamic <sup>1</sup>. The epigenome varies in different  
4 cell types and plays significant roles in various biological processes, such as stem cell  
5 differentiation <sup>2</sup>, the nervous system <sup>3</sup>, cell aging and disease <sup>4</sup>. However, current  
6 methods developed to study the epigenome are vague and may be less  
7 comprehensive than those to study the genome, which can be directly sequenced.  
8 The solutions proposed have been based on extracting the epigenome signals by  
9 enzymatic or chemical means and isolating either the accessible or protected location.  
10 Therefore, much interest has been focused on collecting and comparing genome-wide  
11 chromatin accessibility and chromatin modification to locate the specific epigenetic  
12 changes that accompany cell differentiation, environmental signaling, and disease  
13 development <sup>5</sup>. Next-generation sequencing using DNase I (DNase-seq) and MNase  
14 (MNase-seq) treatment has provided the first demonstration that active chromatin  
15 coincides with nuclease hypersensitivity <sup>6 7</sup>. A comparable method is ATAC-seq which  
16 screens for the transposon hyperactivity on the accessible chromatin <sup>8, 9</sup>. The most  
17 recent and advanced theory that proposed to offer a single molecular long-read  
18 approach for evaluating chromatin accessibility is a third-generation sequencing  
19 technique, referred to as nanopore sequencing, that includes SMACseq <sup>10</sup>, NOME-seq  
20 <sup>11</sup>, and nanoNOME <sup>12</sup>. Chromatin accessibility assays may address certain epigenetic  
21 problems, but the more specific question "which protein regulates chromatin  
22 accessibility" cannot be answered. The dynamic chromatin structure is tightly  
23 regulated by post-translational histone modifications and binding transcription factors

1   <sup>13</sup>. To answer the question: "is a transcription factor bound to a piece of DNA or locate  
2   the histone modification" scientists use "ChIP-seq" to find out if a "protein of interest"  
3   is bound to a piece of DNA <sup>14</sup>. Large-scale chromatin immunoprecipitation assay  
4   (ChIP-seq) utilize specific antibody to precipitate DNA fragments crosslinked with  
5   target proteins, followed by direct ultra-high-throughput DNA sequencing <sup>15</sup>. ChIP-seq  
6   has facilitated the finding of protein-binding motifs and has allowed us to identify  
7   noncanonical protein-binding motifs further. In the literature, these have been  
8   extensively investigated to study the biological functions of the histone acetylation and  
9   methylations, transcription factors, etc. <sup>16-22</sup>. Currently, the major challenge restricting  
10   the use of ChIP-seq is the need for high input DNA amounts. There have been certain  
11   methods established to conduct ChIP-seq with low input DNA, for example,  
12   ChIPmentation <sup>23</sup> CUT&RUN <sup>24</sup> and CUT&TAG <sup>25</sup>. For the CUT&RUN protocol, MNase  
13   is fused to protein A (pA-MNase) to guide the chromatin cleavage to antibodies bound  
14   to the protein targets at their binding sites across the genome <sup>25</sup>. Conceptually similar  
15   work has also been carried out by CUT&TAG, in which transposons are used instead  
16   of the MNase. Many of these techniques and their derivatives have been improved to  
17   achieve the single-cell DNA input <sup>25-28</sup>. However, the complex relationship between  
18   DNA methylation, chromatin modification, and genome structure variation is often  
19   difficult to unravel with a single omics tool. Various methods developed to address this  
20   challenge involving applying the bisulfite treatment to the immunoprecipitated DNA  
21   fragments during ChIP-seq, which ensures that both DNA methylation information and  
22   histone information are procured from the process <sup>29-31</sup>. The above literature review

1 describes the previous and current attempts to address the status of the protein-bound  
2 on DNA.

3 Most ChIP-seq technologies employ the short-read sequencing by next-generation  
4 sequencing (NGS), and downstream analysis has been based on the peak calling  
5 algorithm with statistical analysis of populated fragments<sup>8,9</sup>. As a result, researchers  
6 are then faced with a question - whether the individual chromatin fibers retain the  
7 same long-range physical organization as they remove linkages between distal  
8 segments. Moreover, due to its use of short-read sequencing, the methylation and  
9 structure variation information is limited to the immunoprecipitated genome region. In  
10 addition, these short-read sequencing technologies do not utilize non-cleavage  
11 labeling methods and lack the capability of long-read sequencing to preserve all  
12 necessary epigenetic information in individual chromatin.

13 Our new approach BIND&MODIFY, by fusing methyltransferase to bind and modify  
14 the targeted sites within a long DNA molecule. Furthermore, we developed a single-  
15 molecule long-read bound protein mapping sequencing method. This single-molecule  
16 method directly examines the protein binding regions, DNA methylation, and complex  
17 structure within a single chromatin fiber at multikilobase scales. We used  
18 BIND&MODIFY to study histone methylation and co-methylated histone status in  
19 cancer cells. Moreover, we enumerate the detail regulation in the transposon region  
20 and bivalent regulatory states, while observing distance coordinated changes in  
21 cancer cells. BIND&MODIFY also allows for the footprinting of other specific  
22 transcription factors. We expect future applications of BIND&MODIFY to enable new

1 insights into the status of the dynamic regulators of the genome in various  
2 experimental systems and sequencing platforms.

3

## 4 **Results**

### 5 **The experimental overview of the BIND&MODIFY method**

6 The rationale of the BIND&MODIFY method is to indirectly label DNA regions bound  
7 with protein of interest via an engineered recombinant fusion protein, protein A-  
8 M.EcoGII (pA-M.EcoGII), whose methyltransferase activity can be locally controlled.  
9 The recently characterized adenosine methyltransferase M.EcoGII was capable of  
10 methylating a broad range of genome DNA in a sequence non-specific manner<sup>32</sup>  
11 compared with DamID<sup>33</sup>, which could only methylate the rare GATC motif in the genome  
12 (Supplemental Figure 1). Our BIND&MODIFY approach leverages the power of an  
13 engineered recombinant protein, pA-M.EcoGII. First, the recombinant methyltransferase  
14 was tethered close to the specific antibody-bound protein of interest, and the adenines  
15 in the DNA sequences adjacent to the protein of interest were methylated at m<sup>6</sup>A in a  
16 non-specific manner upon activation (Figure 1A). As m<sup>6</sup>A modifications are very limited  
17 in the native background of the mammalian chromosome<sup>34,35</sup>, the artificial m<sup>6</sup>A  
18 modification, indicating the protein binding motif, could be directly detected by the  
19 nanopore<sup>36,37</sup>.

20

21 Details of recombinant protein pA-M.EcoGII design, construction, and purification steps  
22 can be found in the methods section. Briefly, recombinant pA-M.EcoGII is designed by  
23 cloning two immunoglobulin binding domains of staphylococcal protein A fused N-

1 terminally with M.EcoGII (Figure 1B). The amino acid of the linker region between  
2 protein A and M.EcoGII is DDDKEF. The recombinant pA-M.EcoGII was expressed in  
3 the *E.coli* system and had a molecular weight of 61 kDa (Figure 1C). To access the  
4 function of purified recombinant pA-M.EcoGII, the m<sup>6</sup>A dependent restriction enzyme  
5 DpnI digestion was used to verify pA-M.EcoGII's methylation activity on lambda DNAs.  
6 We found that pA-M.EcoGII processed similar m<sup>6</sup>A methylation specificity compared to  
7 commercially available M.EcoGII (NEB) (Figure 1D). To further evaluate the  
8 effectiveness of purified recombinant pA-M.EcoGII, m<sup>6</sup>A sensitive restriction enzymes  
9 (EcoRV, PciI, PvuII) were employed to cleave pTXB1 plasmid DNAs treated with pA-  
10 M.EcoGII and commercial M.EcoGII (NEB). Both pA-M.EcoGII and M.EcoGII  
11 successfully introduced the m<sup>6</sup>A methylations into the plasmid, which inhibited the  
12 digestion activity of m<sup>6</sup>A sensitive restriction enzymes (Figure 1E). We performed an  
13 ELISA assay to evaluate the potential of pA-M.EcoGII's function of IgG domain binding  
14 and observed that it processed similar activity to commercially available protein A  
15 (Figure 1F). Taken together, our purified recombinant pA-M.EcoGII has comparable  
16 enzymatic activity to commercially available protein A and M.EcoGII.

17  
18 Based on the recombinant pA-M.EcoGII protein, we developed the BIND&MODIFY  
19 protocol (Figure 1G). Briefly, the cells are 1) lightly fixed and tethered to Concanavalin A  
20 (ConA)-coated magnetic beads, 2) incubated with primary antibodies, 3) incubated with  
21 pA-M.EcoGII with minimal washes, 4) S-adenosylmethionine is added and incubated at  
22 37°C for 30min to initialize the methylation reaction, and then quenched by 0.1% SDS,  
23 5) extraction of DNA by phenol-chloroform and prepare the library for Oxford Nanopore

1 Technology (ONT) sequencing. After sequencing, the data is processed through  
2 genome alignment and m<sup>6</sup>A signal detection. The m<sup>6</sup>A possibility cut-off was  
3 determined based on background noise (Supplemental Figure 2). The sensitivity and  
4 specificity of the m<sup>6</sup>A signal are around 0.92 and 0.99, respectively.

#### 5 6 **The validation of BIND&MODIFY on assigned location *in vitro***

7 According to previous studies, the frequency of adenosine occurrence on various  
8 genomes is once in every 3bp<sup>10</sup>, which was the theoretical resolution of M.EcoGII  
9 treated areas. The resolution of BIND&MODIFY depends not only on the adenosine  
10 frequency on the genome but also on the range of the tethered M.EcoGII could reach.  
11 Here we present the test that evaluates the signal resolution of BIND&MODIFY. The  
12 first step to developing the method was to synthesize the DNA with an assigned  
13 antibody binding site. Then, the PCR was used to introduce the m<sup>5</sup>C modification into  
14 the given location on DNAs (Figure 2A). In the following steps, the pA-M.EcoGII  
15 recombinant protein was tethered to the designed site with the help of the m<sup>5</sup>C  
16 antibody. Then the attached M.EcoGII methyltransferase transferred a methyl group to  
17 neighboring adenosine after activation. The N6-methyladenosine (m<sup>6</sup>A) modified  
18 DNAs were sequenced in a Nanopore device, and we performed in-house pipeline  
19 data analysis.

20  
21 In Figure 2B, the m<sup>6</sup>A possibility were plotted along with their genomic location as an  
22 indicator of bound pA-M.EcoGII. The regions with high methylation possibility (>0.53,  
23 Supplemental Figure 2) corresponded to the neighboring areas of the bound pA-



1 M.EcoGII, where the tethered M.EcoGII could methylate the genome sites within a  
2 close distance (Figure 2B). The resolution for detecting pA-M.EcoGII binding sites was  
3 around 100bp (Figure 2B), comparable to the conventional ChIP-seq peak size  
4 distribution of 100-300bp (Supplemental Figure 3).

5  
6 The secondary objective of the present study was to investigate the strand specificity  
7 of the pA-M.EcoGII modifications. We plotted the methylation possibility, as the  
8 indicator of the pA-M.EcoGII location, on both positive and negative strands (Figure  
9 2C). We observed that the pA-M.EcoGII binding signal was located exclusively on the  
10 negative strand rather than the positive strand. This suggested that the tethered  
11 M.EcoGII was in close proximity to the negative strand of DNA and thus preferentially  
12 modified that strand. These features make the BIND&MODIFY method optimal for  
13 long-range histone modification studies on the single molecular level and histone  
14 modification in a strand-specific manner.

15  
16 **BIND&MODIFY reveals the comparable strand-specific view of the epigenomic**  
17 **regulator on genomic DNA**

18 ChIP-seq, CUT&RUN, and CUT&TAG detect protein–DNA binding events and  
19 chemical modifications of histone proteins<sup>38-40</sup>. Several histone trimethylation states,  
20 such as H3K4me3, are well-studied and have been linked to active gene transcription,  
21 whereas H3K27me3's relationship with transcription status is more ambiguous<sup>41, 42</sup>.  
22 Therefore, we chose to explore the transcription status of H3K27me3 status in the  
23 breast cancer cell line MCF-7, using ChIP-seq and BIND&MODIFY. The average read

1 length of Nanopore was around 2kb (Supplemental Figure 4), and the correlation of  
2 the experimental replicates was 0.90 (Supplemental Figure 5).

3  
4 To validate the H3K27me3 signal as determined by BIND&MODIFY, we first evaluated  
5 the consistency between that obtained from BIND&MODIFY and the conventional  
6 methods. The signals ascertained by both the conventional method (ChIP-seq) and  
7 the proposed BIND&MODIFY method provided the similar H3K27me3 position signals  
8 in various genome scales (Figure 3A, Supplemental Figure 6). Over 95% of the high  
9 confidence position signals gathered using ChIP-seq were also observed using  
10 BIND&MODIFY (Supplemental Figure 7). By analyzing the regional signal strength, we  
11 found that the BIND&MODIFY signal strength for m<sup>6</sup>A counts was strongly correlated  
12 with ChIP-seq peak signal intensity (Figure 3B). Taken together, these  
13 BIND&MODIFY results exhibited a range of values comparable with conventional  
14 ChIP-seq.

15  
16 Some studies have observed an inverse relationship between H3K27me3 density in  
17 transcription start sites and gene expression <sup>41, 42</sup>. To profile the enrichment of  
18 H3K27me3 within genomic regions, enrichment data were visualized using ChIP-seq  
19 H3K27me3 peak centered signal plots. Overall, the BIND&MODIFY results are  
20 consistent with those of ChIP-seq (Figure 3C). In the TSSs of low expression genes  
21 (bottom expression quantile), H3K27me3 was prominently depleted around the TSS  
22 with a distinctive enrichment directly downstream and upstream of the TSSs (Figure  
23 3D). The bimodal pattern is relatively consistent in both ChIP-seq and BIND&MODIFY

1 results. Good agreement was also found when comparing results from this work  
2 against published data <sup>43 44</sup>. Further analysis was performed to determine whether the  
3 histone trimethylation exhibited strand specificity using the BIND&MODIFY method.  
4 Subsequently, we found that H3K27me3 was prominently enriched downstream of  
5 TSS in the positive strand and upstream of TSS in the negative strand, contributing to  
6 form the bimodal pattern around TSSs (Figure 3E). An example of the gene is  
7 illustrated in Supplemental Figure 8. In contrast, we did not observe the significant  
8 strand-specific pattern around the TSSs of high expression genes (Supplemental  
9 Figure 8).

10 As a critical regulator of genome organization, the CCCTC-binding factor (CTCF) has  
11 been characterized as a DNA-binding protein with essential functions in maintaining  
12 the topological structure of chromatin and inducing gene expression <sup>45</sup> (Supplemental  
13 Figure 9A). In CUT&TAG data, we identified the strong CTCF binding sites 100bp  
14 upstream of the TSSs of actively expressed genes (Supplemental Figure 9B). In  
15 contrast, the CTCF binding signal around the TSSs of inactive genes was distributed  
16 evenly (Supplemental Figure 9C). Compared with CUT&TAG, BIND&MODIFY  
17 presented a similar CTCF signal pattern around TSS in active and inactive genes.  
18 Further analysis was done to see whether the antibody-bound CTCF domains  
19 maintained selective proximity to either one strand (Supplemental Figure 9D). We  
20 found that the CTCF signal on the negative strand was sharper and more potent than  
21 on the positive strand and even more consistent with the CUT&TAG signal pattern  
22 (Supplemental Figure 9E), suggesting the antibody-bound domain was in close  
23 proximity to the negative strand. Based on protein crystal structure analysis <sup>46</sup>, the

1 antibody-bound domain is the C terminal of the CTCF and spatially closer to the  
2 negative strand, further supporting this hypothesis (Supplemental Figure 10).  
3 These results have demonstrated that the BIND&MODIFY method has exhibited that it  
4 is capable of mapping the histone modifications in a manner comparable with  
5 conventional methods, in addition to highlighting the challenges associated with a  
6 strand-specific view of epigenomic regulators on genome DNA

7

8

### 9 **Long-range sequencing resolves the retrotransposon regions with high** 10 **resolution**

11 The retrotransposon composed of repeated sequences can be integrated elsewhere in  
12 a genome and has performs various critical biological functions. The three major  
13 retrotransposon orders are long terminal repeat (LTR) retrotransposons, long  
14 interspersed elements (LINEs), and short interspersed elements (SINEs). Due to the  
15 repeated sequence of retrotransposon, the short-read sequencing data exhibits  
16 40~60% multiple mapping rate in these complex regions (Supplemental Figure 11).  
17 The multiple mapping in retrotransposons would cause signal noise or signal loss in  
18 the ChIP-seq (Figure 4A). Compared with ChIP-seq, the BIND&MODIFY significantly  
19 improves the unique mapping rate (Supplemental Figure 11), by taking advantage of  
20 long-range sequencing, which generates reads that may span the entire length of full  
21 transposon and avoid multiple mapping issues. Considering these advantages, the  
22 long-range sequencing was also used to identify the novel transposon deletion and  
23 insertions <sup>47</sup>. There have been minimal studies regarding the H3K27me3 on

1 retrotransposons <sup>48</sup>. We visualized the H3K27me3 status on LTR, SINE, and LINE  
2 using retrotransposon-centered plots, including an upstream/downstream 300bp of  
3 similar size retrotransposons (Supplemental Figure 12). In the ChIP-seq, we observed  
4 the very high background noise lacking any peak signal on LTR regions (Figure 4B).  
5 In contrast, the BIND&MODIFY displayed the H3K27me3 binding signal on the LTR  
6 region, providing a 10X better signal resolution compared to ChIP-seq (Figure 4B).  
7 While analyzing another type of retrotransposon, SINE, ChIP-Seq lost the H3K27me3  
8 signal in SINEs. However, BIND&MODIFY displayed two clear peak signals in the  
9 SINEs (Figure 4C-D). In addition, these results are consistent well with existing  
10 studies regarding H3K27me3 activity on SINEs <sup>48</sup>.  
11 The short interspersed nuclear element (SINE) B1 has insulator activity mediated by  
12 the binding of specific transcription factors along with the insulator-associated protein  
13 CTCF <sup>49</sup>. A genome-wide analysis of CTCF binding sites in the human and mouse  
14 genomes discovered that many CTCF binding sites are derived from TE sequences <sup>50</sup>.  
15 Concordant with previous reports, the BIND&MODIFY exhibited a clear CTCF signal in  
16 the SINEs, which was absent in the ChIP-Seq data (Supplemental Figure 13). In  
17 summary, BIND&MODIFY is capable of taking advantage of the long-range  
18 sequencing to precisely map histone modifications and protein-DNA interactions in the  
19 challenging complex genome regions.

20

### 21 **The histone modification status on single-molecular resolution**

22 The conventional CUT&TAG and ChIP-seq methods are based on statically  
23 calling the peak of the enriched read in a specific region <sup>51</sup>. Recent single-

1 molecule and single-cell measurements of histone accessibility suggest that  
2 using ATAC-seq to evaluate cell populations represent an ensemble average of  
3 distinct nucleosome states <sup>52</sup>. An essential attribute of the BIND&MODIFY  
4 technique, is that it measures the histone modification in single-molecular  
5 resolution by taking advantage of the slight variance (Supplemental Figure 14),  
6 thereby increasing the cumulative possibility of segments (Supplemental Figure  
7 15).

8 We then hypothesized whether BIND&MODIFY could reveal the different  
9 H3K27me3 statuses by investigating the chr20:52223000-52225500 loci. The  
10 chr20:52223000-52225500 loci have modulated the lncRNA LOC105372672  
11 and Zinc finger protein 217 (ZNF217) and has been demonstrated as a  
12 prognostic biomarker and therapeutic target during breast cancer progression  
13 <sup>53, 54</sup>. The conventional ChIP-Seq enriched the H3K27me3 bound motif by  
14 antibody-guided amplification, which could be overrepresented (Figure 5A).  
15 The baseline signal of this region was 6, which was considered to be the  
16 background noise in the experiments (Figure 5A). In contrast, the  
17 BIND&MODIFY presents a strikingly comprehensive picture of the H3K27me3  
18 in this area. Remarkably, super-resolution of BIND&MODIFY uncovered  
19 remarkable three different epigenetic states (Figure 5B): a repressed state in  
20 which most histones were methylated, inhibiting the gene expression contained  
21 within the genome region; a poised state in which half of the histones were  
22 methylated, which permit the transition from the inactive state to the active  
23 state; and an active state largely devoid of histone trimethylation. Some of the

1 H3K27me3 could only be observed in the subpopulation of the genome fibers,  
2 suggesting the highly heterogenous histone methylation in cancer cells. The  
3 signal peaks (chr20: 52225000-52225500) in ChIP-seq sum up the H3K27me3  
4 loci in two different states. The subpopulation of inactive fully methylated  
5 chromatin leads to the baseline signal in ChIP-seq, which was thought to be  
6 the background noise in the experiment. Our findings, which support three  
7 epigenetic states, align with the results reported by other publications in  
8 literature <sup>55-58</sup>. Many genome regions in cancer cells harbor a distinctive  
9 histone modification signature that combines the activating histone H3 Lys 4  
10 trimethylation (H3K4me3) mark and the repressive H3K27me3 mark. The  
11 poised states with these bivalent domains, which are considered to be linked to  
12 poise the expression of developmental genes, permitting timely activation  
13 (activate form) while maintaining repression (repressed state) in the absence  
14 of differentiation signals <sup>55</sup>. In contrast to the heterogeneous behaviors seen  
15 above, the gene desert areas without gene transcription activity processed only  
16 one repressed state wherein most histones were trimethylated (Supplemental  
17 Figure 16). The previous bivalent model was established by finding the  
18 overlapped H3K4me3 and H3K27m3 average peaks in NGS but not  
19 acknowledge their poised status. These findings reinforce the general belief  
20 that bivalent histone modification regulates gene expression.  
21 However, the single molecular statuses of each gene are challenging to be  
22 quantified. Therefore, we could not obtain a big-picture view of global genes,  
23 summarizing a more comprehensive perspective with specific examples and

1 details. Consequently, we used the mean methylation ratio of one molecule to  
2 present the methylation status of this molecule (Supplemental Figure 17), and  
3 the heterogeneity of the genes could be visualized by a series of mean  
4 molecular methylations (Figure 5B, gradient line on the right panel). We  
5 summarized the H3K27me3 heterogeneity of genes in Chr20 (Figure 5C). 95%  
6 of genes display a homogenous H3K27me3 regulation status with minimal  
7 heterogeneity among molecules. Only one cluster with 31 genes (Figure 5C,  
8 cluster 3) adequately demonstrated the very high heterogeneity of H3K27me3  
9 regulation, illustrating its active, repressed, and poised state. These genes are  
10 under typical bivalent mode regulation of H3K27me3. Using gene ontology  
11 analysis, we found that these genes were enriched in the breast cancer-related  
12 pathways, for example, the VEGF signaling pathway<sup>59</sup>, B cell receptor signaling  
13 pathway<sup>60</sup>, PD-L1 checkpoint pathway<sup>61</sup>, etc. (Supplemental Figure 18). The  
14 bivalent mode regulation in these pathways might elucidate the mechanisms  
15 involved in tumor heterogeneity, evolution, drug resistance, immune evasion,  
16 and the cause of metastasis.

17

### 18 **The BIND&MODIFY reveals the long-distance correlation of regulators**

19 In the transition from a chromatin repressed state to an activated state, the  
20 H3K27me3 changed its rhythmicity. The region (chr20: 52223500-52224200)  
21 was first devoid of H3K27me3 and then adjacent areas concurrently removed  
22 any histone trimethylation during the next step, suggesting the possibility of a  
23 synergic regulatory switch at this location. To quantify distance



1 (anti)correlation between chromatin trimethylation states, we developed a  
2 modified correlation coefficient (CC) metric for assessing the degree of  
3 trimethylation correlation between genomic regions. Average CC profiles  
4 centered on statically positioned nucleosomes revealed a detectable  
5 correlation between nucleosome positions up to 100bp (Supplemental Figure  
6 19). These observations are consistent with the assumption that nucleosomes  
7 impose restrictions on one another, resulting in a short-range correlation  
8 between nucleosome footprints that dephases over longer ranges <sup>10</sup>.  
9 Furthermore, CC analysis of DNA confirmed the long-range positive correlation  
10 between the promoter region and this upstream, downstream element (Figure  
11 6A, Supplemental Figure 20).  
12 However, the CC index is only suitable for describing the distance correlation  
13 of H3K27me3 for single genes. To further explore the biological significance of  
14 distance correlation, we developed the new DE index (Distance Effect index) to  
15 quantify the distal effects of each genomic locus (Supplemental Figure 21).  
16 The higher DE index means that these target genomic loci have a stronger  
17 distal correlation, suggesting that the regulatory mechanisms present on these  
18 sites could impact a larger area. Therefore, the genetic region of interest could  
19 be presented as a series of DE indices on the corresponding loci. We plotted  
20 the DE index of all the transcription regions (2kb upstream of TSS) on chr20  
21 (Figure 6B). There were several DE patterns consistent with H3K27me3 in the  
22 transcription region. Some transcription initiation sites had a powerful DE index  
23 signal, which suggested the rhythmic change in the more extensive area and

1 its substantial regulator impact on the distal genomic region (Figure 6B).  
2 Consistent with studies that have associated H3K27me3 with transcriptional  
3 repression <sup>62</sup>, a strong DE index signal for H3K27me3 was related to lower  
4 gene expression (Figure 6B). Based on gene ontology analysis, the  
5 dysregulation of these genes was associated with cancer pathways, such as  
6 those for ubiquitin dysregulation, Apelin signaling, proteasome, Oxytocin  
7 signaling, etc (Supplemental Figure 22).  
8 We further plotted the distance correlation of transcription regions with CTCF  
9 regulators. The the areas where the transcription initiation sites have strong  
10 DE index signal (Figure 6C, Cluster 3) indicate that the CTCF on those sites  
11 may synergically affect the distal genomic sites. Compared with the gene  
12 expression profile, some gene expression is strongly enhanced. By gene  
13 ontology analysis, these enhanced distance regulations were also related to  
14 the cancer-promoted pathways such as those for EGFR tyrosine kinase  
15 inhibitor resistance, GABAergic synapse, Hippo signaling pathway, etc.  
16 (Supplemental Figure 23). In addition, the observed enhanced distance  
17 regulation may have elucidated the super-enhancer/suppressor effects, which  
18 do affect the gene region up to 8kb <sup>1</sup>.  
19 Overall, the BIND&MODIFY was able to demonstrate the highly heterogenous  
20 status of histone modification in the cancer cells and the long-range interaction  
21 of these histone modifications.

22

23 **Discussion**

1 In literature, ChIP-seq and CUT&TAG have been essential epigenetic study tools for  
2 many years, for example, histone modification, transcription factor binding, and much  
3 more. However, these methods suffer from the limitations that the detected signals are  
4 represented using common immunoprecipitation enriched DNA fragments in common  
5 without considering the heterogeneity in DNA molecules. The short-read sequences  
6 also prevent the possibility of studying the long-range interactions in multi-omics  
7 epigenome studies. We designed a new method, "BIND&MODIFY," by using the  
8 recombinant pA-M.EcoGII methyltransferase to non-fragmented labeling the local DNA  
9 regions. Through this method, we were able to simultaneously profile multi epigenomic  
10 information on a truly unbiased genome-wide scale, measure the underlying distribution  
11 of the histone modifications based on single molecular resolution, and identified loci  
12 exhibiting significant correlation.

13 BIND&MODIFY generated a similar general signal trend for the H3K27me3 loci to the  
14 widely used ChIP-seq. Despite the significant commonalities between the results of the  
15 two methods, relatively small signal variations were observed in terms of the variable  
16 peak signal strength. We postulate that these were likely caused by the different  
17 fundamental principles between BIND&MODIFY and conventional ChIP-seq. The  
18 BIND&MODIFY enables unbiased profiling of the DNA molecule without  
19 immunoprecipitation enrichment, thereby reflecting the true nature of the epigenome.  
20 Compared with that method, ChIP-seq only amplifies the common loci signals among  
21 most DNA molecules by immunoprecipitation enrichment and neglects the loci signals  
22 of in individual DNA molecules.

1 Moreover, the different measuring units to present in signal strength also led to the  
2 difference. One drawback of the BIND&MODIFY is that it sequences the non-signal  
3 regions, which is unavoidable, thereby requiring a higher sequencing depth.  
4 Fortunately, the nanopore throughput is increasing rapidly, while selective enrichment  
5 methods are also becoming increasingly available. Augmenting the read length are also  
6 helpful, especially for analyzing the distance correlation of distal regulatory elements.

7 We also compared our method with CUT&TAG. The significant difference is that the  
8 transposon utilized in CUT&TAG is not reusable once inserted into the DNAs. In  
9 contrast, the methyltransferase used in BIND&MODIFY could methylate the multiple  
10 regional adenosines, enhancing the signal strength. CUT&TAG also requires a  
11 secondary antibody to tether more transposons to the location and increase the chance  
12 of DNA insertion. In BIND&MODIFY method, we found that the secondary antibody is  
13 not necessary. Others may suggest that the reusable methyltransferase may increase  
14 the false-positive signals in non-target regions. However, during *in vitro* evaluation, we  
15 found the only scattered signals in the non-targeted area, but no clustered signals,  
16 which were consistent with identifiable loci signal (Figure 2). In addition, during *in vivo*  
17 evaluation, the genomic DNA was not movable by fixation, and the DNA  
18 methyltransferase can only activate locally (Figure 3). Therefore, any false-positive  
19 signal of *in vitro* and *in vivo* can be safely neglected based on these studies.

20 Base-calling is another area of future improvement. We also used the Pacbio  
21 sequencing data (specificity 0.99) to train our m<sup>6</sup>A calling algorithm with nanopore  
22 sequencing. Both sensitivity and specificity with regard to nanopore m<sup>6</sup>A detection were

1 satisfactory. We are also trying to call the native m<sup>5</sup>C and artificially labeled m<sup>6</sup>A  
2 simultaneously and analyze the relationship between histone modification and DNA  
3 methylation. To our surprise, the artificially labeled m<sup>6</sup>A did not significantly affect the  
4 m<sup>5</sup>C detection efficiency significantly, and the m<sup>5</sup>C correlation using bisulfite sequencing  
5 was 0.8 (Supplemental Figure 24). The relationship between 5mC and histone  
6 modification in single molecules should be determined in much deeper sequencing  
7 depth. Alternatively, we could also use the Pacbio, which reads one nucleotide at a time  
8 without the neighboring nucleotide signal interference. Overall, the simultaneous  
9 detection of 5mC and its regulator position in the single-molecule level is applicable with  
10 BIND&MODIFY.

11 Possible endogenous methylation in mammalian genomes also represents the potential  
12 confounding factor in our analysis. By examining the data of IgG control genomic DNA,  
13 we found that the quantity of m<sup>6</sup>A in original DNA is thousands of times fewer than in  
14 the treated samples, suggesting the minimal effect of the endogenous methylation. To  
15 determine the thresholds for the possibility of real m<sup>6</sup>A and background noise, the IgG  
16 control sample data was used to determine and filter out the background noise signal  
17 distribution is below 0.53, which could significantly improve the m<sup>6</sup>A calling specificity  
18 and sensitivity.

19 However, there are also some species where m<sup>6</sup>A occurs endogenously and strongly  
20 correlated with the binding motif of the histone modification. Modifications targets such  
21 as m<sup>5</sup>C, m<sup>4</sup>C, cytidine deamination, or 5-glucomethylation are among the potential  
22 future alternatives in such cases. Also, some artificial SAM could be used to introduce

1 the biotin to the specific sites may strongly avoid the endogenously confounding signals.  
2 Finally, we believe that the integration of BIND&MODIFY into a single-molecule multi-  
3 omics assay represents a fruitful direction that will benefit future research. With the  
4 method, we are able to simultaneously label the two or more proteins located in the  
5 single DNA molecule with the different modification labels. Then the protein interaction  
6 distance on the genome would be measurable in this method, providing a potential  
7 breakthrough in the protein-protein interaction in single-molecule genome scales. In  
8 principle, similar approaches may also apply to the individual RNA molecules to study  
9 the RNA binding proteins. We expect this technology to contribute to the essential new  
10 class of tools that will improve the simultaneous study of multi-epigenomics.

11

## 12 **Methods**

### 13 Cell culture and antibodies

14 Human mammary gland carcinoma cell line MCF-7 were obtained from ATCC. MCF-7  
15 were grown in DMEM (Gibco,11995065) supplemented with 10% FBS (Gibco,10099141),  
16 0.01mg/ml insulin (HY-P1156, MedChemExpress), and 1% penicillin-streptomycin (Gibco,  
17 15140122). Cell line was regularly checked for mycoplasma infection (Yeasen,  
18 40612ES25). We used the following antibodies: H3K27me3 (Cell Signaling Technology,  
19 9733), Guinea Pig anti-Rabbit IgG (Heavy & Light Chain) antibody, Anti-CTCF Antibody  
20 (sigma,07-729-25UL), Protein A Antibody, pAb, Chicken (A00729-40, GenScript).

21

22 Recombinant protein preparation of protein A-M.EcoGII

1 pTXB1 vector (NEB, N6707S) was used as the protein expression backbone.  
2 Downstream of the lac operator, a ribosome binding site and three FLAG epitope tags  
3 were introduced, followed by two IgG-binding domains of staphylococcal protein A  
4 encoding sequence, which was synthesized based on the previous work (Addgene,  
5 124601). The M.EcoGII encoding sequence (Addgene, 122082) was also synthesized  
6 based on its original discovery. The amino acid linker sequence between the C-terminus  
7 of protein A and N-terminus of M.EcoGII is DDDKEF. The sequenced plasmid was  
8 transformed into C3013 competent cells (NEB) following the manufacturer's protocol.  
9 Each colony tested was inoculated into a 1 mL LB medium, and growth was continued at  
10 37 °C for 2 h. That culture was used to start a 50 mL culture in 100 µg/mL carbenicillin  
11 containing LB medium and incubated on a shaker until the cell density reached an A600  
12 of 0.6, whereupon it was chilled on ice for 30 min. Fresh IPTG was added to 0.25 mM to  
13 induce expression. Then the culture was incubated at 27 °C on a shaker for 16 h. The  
14 culture was then collected by centrifugation at 10,000 rpm, 4 °C for 30 min, the  
15 supernatant was discarded. The bacterial pellet was frozen in a dry ice-ethanol bath and  
16 stored at -70 °C. The frozen pellet was resuspended in 20 mL chilled HEGX Buffer (20  
17 mM HEPES-KOH at pH 7.2, 0.8 M NaCl, 1 mM EDTA, 10% glycerol, 0.2% Triton X-100)  
18 including 1× Roche Complete EDTA-free protease inhibitor tablets and lysed using a high-  
19 pressure cell disrupter (JNBIO, China). Cell debris was removed by centrifugation at  
20 10000 rpm for 30 min at 4 °C, and the supernatant was loaded onto a column equipped  
21 with chitin slurry resin (NEB, S6651S), then incubated the column on a rotator at 4 °C  
22 overnight. The unbound soluble fraction was drained, and the columns were rinsed with  
23 20 mL HEGX containing Roche Complete EDTA-free protease inhibitor tablets. The chitin

1 slurry was transferred to a 15 mL conical tube and resuspended in Elution buffer (10 mL  
2 HEGX with 100 mM DTT). The tube was placed on the rotator at 4 °C for ~48 h. The  
3 eluate was collected and concentrated using an Amicon Ultra-4 Centrifugal Filter Units  
4 10 K (Millipore, UFC801096), and sterile glycerol was added to make a final 50% glycerol  
5 stock of the purified protein. The fusion protein has stored the protein at -80°C.

6

7 Size characterization of recombinant protein pA-M.EcoGII

8 The size of purified pA-M.EcoGII recombinant protein was characterized by C Coomassie  
9 blue staining by resolving the protein in 7.5% SDS-PAGE gel.

10

11 ELISA of recombinant protein pA-M.EcoGII

12 To verify the binding efficiency of pA-M.EcoGII, we performed an ELISA assay in vitro.

13 The purified recombinant protein or commercial M.EcoGII (NEB, M0603S) was diluted

14 with coating buffer (0.05 M NaHCO<sub>3</sub> buffer, pH 9.2). The 96 well high binding plate

15 (Greiner Bio-one, 655061) was coated with 100 µL pA-M.EcoGII or commercial M.EcoGII

16 (NEB,M0603S) (1:120, 1:480 of stock 10mg/ml), negative control, commercial ProteinA

17 (ThermoFisher, 21181) (1:120, 1:480 of stock 10mg/ml) in coating buffer per well for 4 h

18 at room temperature. Further, 200 µL SuperBlock™ (TBS.) Blocking Buffer – Blotting

19 (Invitrogen,37537) was added to each well and incubated for 2 h at room temperature.

20 Then each well was washed 5X with 380 µL washing buffer (0.14 M NaCl; 0.01 M

21 PO<sub>4</sub> ;0.05% Tween 20; pH 7.4). After that 95 µL Secondary Antibody (1:10000 in PBSB)

22 was added to each well and incubated for 1 h at room temperature. The plate was washed

23 4X with 380 µL washing buffer (0.14 M NaCl; 0.01 M PO<sub>4</sub> ;0.05% Tween 20; pH 7.4). 90



1     $\mu$ L TMB substrate solution was added and incubated for 15min at room temperature in  
2    the dark. Finally, 90  $\mu$ L stop buffer (1.8N H<sub>2</sub>SO<sub>4</sub>) was added to stop the color development  
3    and read immediately at 450nm (yellow color) using FLUOstar® Omega Plate Reader by  
4    BMG LABTECH.

5  
6    *In vitro* methtransferase activity of pA-M.EcoGII recombinant protein

7    To access the *in vitro* methylation efficiency of pA-M.EcoGII recombinant protein, m<sup>6</sup>A  
8    methylation-sensitive restriction enzyme DpnI was used to probe the adenine methylation  
9    at GATC motif of 7 kb unmethylated dsDNA. The 7 kb dsDNA substrate was PCR  
10    amplified from lambda DNA. For the methyltransferase reactions, each 50  $\mu$ l reaction  
11    volume was assembled on ice and contained 1 $\mu$ g 7kb unmethylated dsDNA, 1X Cutsmart  
12    buffer, 640  $\mu$ M SAM, and 4  $\mu$ L of pA-M.EcoGII recombinant protein or commercial M.  
13    EcoGII, then the mixture was incubated at 37 °C for 1 h. The methylated product was  
14    purified using 0.6X Ampure XP (BECKMAN COULTER, A63882). 1  $\mu$ l of DpnI (NEB) was  
15    added to the reaction mixture to further incubate at 37 degrees for 10min. DpnI cutting  
16    efficiency was examined by 1% agarose gel electrophoresis.

17  
18    To assess the specificity of pA-M.EcoGII recombinant protein methylation and its  
19    effectiveness at inhibiting restriction endonucleases, we carried out restriction analyses  
20    using an unmethylated 7kb linear dsDNA template, which was PCR amplified from pTXB1.  
21    One enzyme known to be insensitive to dA methylation (BamHI) and three enzymes  
22    (EcoRV, PciI, PvuII) that cleave different base-pair sequences, the activities of which are  
23    known to be blocked by adenine methylation. The commercial M.EcoGII and pA-

1 M.EcoGII recombinant protein methyltransferase reactions on the 7kb linear dsDNA were  
2 carried out the same as described above. All restriction endonucleases used in this study  
3 were purchased from NEB. For the restriction enzyme digest reaction, each 30  $\mu$ L  
4 reaction volume contained 500 ng methylated dsDNA, the appropriate digestion buffer,  
5 time, and amount of enzyme following the manufacturer's protocol of NEB. The enzymes  
6 were inactivated at 80 °C for 20 minutes. All sample was loaded to 1% agarose gel for  
7 analysis.

8

#### 9 *In vitro* pA-Tn5 transposome preparation

10 The pA-Tn5 was purchased from Vazyme (Vazyme, S603). To generate the pA-Tn5  
11 adapter transposon, 7  $\mu$ L of a 50  $\mu$ M equimolar mixture of pre-annealed Tn5MEDS-A and  
12 Tn5MEDS-B oligonucleotides, 40  $\mu$ L of 7.5  $\mu$ M pA-Tn5 fusion protein, and 28  $\mu$ L coupling  
13 buffer were mixed. The mixture was incubated for 1 h on a Thermocycler at room  
14 temperature and then stored at -20 °C.

15

#### 16 CUT&TAG for bench-top application

17 Gently resuspend and withdraw enough of the slurry such that there will be 10  $\mu$ L for each  
18 final sample. Place the tube on a magnet stand to clear (30 s to 2 min). Withdraw the  
19 liquid, and remove it from the magnet stand. Add 1.5 mL Binding buffer (20 mM HEPES  
20 pH 7.5, 10 mM KCl, 1 mM CaCl<sub>2</sub>, and 1 mM MnCl<sub>2</sub>), mix by inversion or gentle pipetting,  
21 remove liquid from the cap and side with a quick pulse on a microcentrifuge. Resuspend  
22 in a volume of Binding buffer equal to the volume of bead slurry (10  $\mu$ L per final sample).  
23 10  $\mu$ L of activated beads were added per sample and incubated at room temperature for

1 15 min. Cells were harvested, counted and centrifuged for 3 min at 600×g at room  
2 temperature. 500000 cells were washed 2X in 1.5 mL Wash Buffer (20mM HEPES pH  
3 7.5, 150mM NaCl, 0.5mM Spermidine, 1× Protease inhibitor cocktail), after that the cells  
4 were resuspended in 1.5 mL Wash Buffer by gentle pipetting in a 2mL tube. The unbound  
5 supernatant was removed by placing the tube on the magnet stand to clear and pulling  
6 off all of the liquid. The bead-bound cells were resuspended with 50 µL Dig-Wash Buffer  
7 (20mM HEPES pH 7.5, 150mM NaCl, 0.5mM Spermidine, 1× Protease inhibitor cocktail,  
8 0.05% Digitonin) containing 2mM EDTA and a 1:100 dilution of the appropriate primary  
9 antibody. The primary antibody was incubated on a rotating platform overnight at 4 °C.  
10 The primary antibody was removed by placing the tube on the magnet stand to clear and  
11 pulling off all of the liquid. The secondary antibody was diluted 1:100 in 100 µL of Dig-  
12 Wash buffer, and cells were incubated at room temperature for 1h. Cells were washed  
13 using the magnet stand twice for 5 min in 1 mL Dig-Wash buffer to remove unbound  
14 antibodies. 0.04 µM of pA-Tn5 was prepared in 150 µL Dig-Med Buffer (0.05% Digitonin,  
15 20 mM HEPES, pH 7.5, 300 mM NaCl, 0.5 mM Spermidine, 1× Protease inhibitor cocktail).  
16 After removing the liquid on the magnet stand, 150 µL was added to the cells with gentle  
17 vortexing, which was incubated with pA-Tn5 at room temperature for 1 h. Cells were  
18 washed twice for 5 min in 1 mL Dig-Med Buffer to remove unbound pA-Tn5 protein. Next,  
19 cells were resuspended in 300 µL Tagmentation buffer (10 mM MgCl<sub>2</sub> in Dig-Med Buffer)  
20 and incubated at 37 °C for 1 h. To stop tagmentation, 15 µL EDTA, 3 µL 10% SDS, 2.5 µL  
21 20mg/ml proteinase K was added to 300 µL of the sample, which was incubated in a  
22 water bath overnight at 55 °C. 320 µL PCI was added to the tube and mixed by full-speed  
23 vortexing for 2 s. The upper phase was transferred to a phase-lock tube. 320 µL

1 Chloroform was added to the tube and inverted ~10x to mix. The tube was Centrifuged  
2 for 3 min at room temperature at 16,000 x g. The aqueous layer was transferred to a fresh  
3 1.5 mL tube containing 750  $\mu$ L 100% ethanol and mixed by pipetting. The tube was  
4 Chilled on ice and centrifuged for at least 10 min at 4 °C 16,000 x g. The liquid was  
5 removed, and 1 mL 100% ethanol was added to the tube, then centrifuged 1 min at 4 °C  
6 16,000 x g. The liquid was carefully poured off and air dry. When the tube is dry, 25  $\mu$ L  
7 10 mM Tris-HCl pH 8, 0.1 mM EDTA was added to the tube and vortex on full of dissolving  
8 the genomics DNA  
9  
10 BIND&MODIFY for bench-top application  
11 500,000 cells were used in each BIND&MODIFY assay. Cells were harvested, counted,  
12 and centrifuged for 3 min at 600xg at room temperature. Cells were first lightly fixed by  
13 adding formaldehyde (ThermoFisher, 28906) to a final concentration of 0.1% in 1.5ml  
14 PBS, and incubated at room temperature for 15min. 2.5M Glycine was added to final  
15 concentration of 0.125 M to quench the additional formaldehyde. Fixed cells were then  
16 washed twice in 1.5 mL Wash Buffer (20mM HEPES pH 7.5, 150mM NaCl, 0.5mM  
17 Spermidine, 1 $\times$  Protease inhibitor cocktail) by gentle pipetting. 10  $\mu$ L of activated beads  
18 were added per sample and incubated at room temperature for 15 min. The unbound  
19 supernatant was removed, bead-bound cells were resuspended in 100  $\mu$ L Dig-Wash  
20 Buffer (20 mM HEPES pH 7.5, 150 mM NaCl, 0.5 mM Spermidine, 1 $\times$  Protease inhibitor  
21 cocktail, 0.05% Digitonin) containing 2 mM EDTA and a 1:100 dilution of the appropriate  
22 primary antibody. Primary antibody incubation was performed on a rotating platform  
23 overnight at 4 °C. The primary antibody was removed by placing the tube on the magnet

1 stand to clear and pulling off all of the liquid. No secondary antibody was used for  
2 BIND&MODIFY. Cells were washed twice using the magnet stand for 5 min in 1 mL Dig-  
3 Wash buffer. 4  $\mu$ L of pA-M.EcoGII was prepared in 150  $\mu$ L Dig-Wash Buffer. After  
4 removing the liquid on the magnet stand, 150  $\mu$ L of pA-M.EcoGII containing Dig-Wash  
5 buffer was added to the cells with gentle vortexing, which was incubated at room  
6 temperature for 1 h. Cells were washed 2 $\times$  for 5 min in 1 mL Dig-Wash Buffer and 1x for  
7 5 min in 1mL Low salt buffer (20 mM HEPES pH 7.5, 0.5 mM Spermidine, 1 $\times$  Protease  
8 inhibitor cocktail, 0.05% Digitonin) to remove unbound pA-M.EcoGII protein. Next, cells  
9 were resuspended in 300  $\mu$ L Reaction buffer (20 mM HEPES pH 7.9, 0.5 mM Spermidine,  
10 1 $\times$  Protease inhibitor cocktail, 0.05% Digitonin, 10 mM 1M MgCl<sub>2</sub>, 300 mM sucrose) .The  
11 reaction was activated by adding 5  $\mu$ L SAM of 32 mM at 37°C in a thermmixer. Additional  
12 5  $\mu$ L SAM of 32 mM was added to the tube at 7.5 min and 15 min. The reaction was  
13 stopped at 30 minutes by placing the tube on the magnet stand to clear and pulling off all  
14 of the liquid. The bead-bound cells was resuspended with 300  $\mu$ L Digestion Buffer(20 mM  
15 HEPES pH 7.5, 300 mM NaCl, 0.5 mM Spermidine, 1 $\times$  Protease inhibitor cocktail, 0.05%  
16 Digitonin, 16.7 mM EDTA, 0.1% SDS, 0.167 mg/mL proteinase K) and incubated in water  
17 bath overnight at 55 °C. The method for genomic DNA extraction was the same as  
18 CUT&TAG for bench-top application.

19

## 20 CUT&TAG library preparation

21 To amplify libraries, 21  $\mu$ L of CUT&TAG genomic DNA was mixed with 2  $\mu$ L of a universal  
22 i5 and a uniquely barcoded i7 primer, using a different barcode for each sample. A volume  
23 of 25  $\mu$ L KAPA HIFI ready mix (KAPA, KK2602) was added and mixed. The sample was

1 placed in a Thermocycler with a heated lid using the following cycling conditions: 72 °C  
2 for 5 min; 98 °C for 30 s; 14 cycles of 98 °C for 10 s, 63 °C for 30 s and 72 °C for 15s;  
3 final extension at 72 °C for 1 min and hold at 8 °C. Post-PCR clean-up was performed by  
4 adding 1.3× volume of Ampure XP beads (Beckman Counter), and libraries were  
5 incubated with beads for 5 min at RT, washed twice gently in 80% ethanol, and eluted in  
6 30 µL 10 mM Tris pH 8.0. the library was analyzed using Agilent 2100 (2100 Bioanalyzer  
7 Instrument, G2939BA). Then the library was sequenced in MGI2000 platform with  
8 PE100+100+10 sequencing.

9

#### 10 BIND&MODIFY library preparation

11 The BIND&MODIFY library was prepared following the manufacturer's protocol of SQK-  
12 LSK109 (Nanopore, SQK-LSK109). The library was sequenced in the ONT PromethION  
13 platform with R9.4.1 flow cell.

14

#### 15 Basecalling and DNA methylation calling

16 Reads from the ONT data were performed using megalodon (V2.2.9), which used  
17 Guppy basecaller to basecalling and Guppy model config  
18 `res_dna_r941_min_modbases-all-context_v001.cfg` has been released into the Rerio  
19 repository was used to identify DNA m<sup>6</sup>A methylation. `megalodon_extras` was used to  
20 get per read `modified_bases` from the megalodon basecalls and mappings results. In  
21 order to further explore the accurate threshold of methylation probability, a control  
22 sample with almost no m<sup>6</sup>A methylation was used as background noise, and Gaussian

1 mixture model was used to fit the methylation probability distribution generated by  
2 megalodon.

3

4 Accessibility score

5 Hg19 genome and the gene elements were processed into 50bp bin sliding 5bp by

6 Bedtools (v2.27.1)<sup>63</sup>. The accessibility score over multi base-pair windows were

7 calculated as methylation ratio = m<sup>6</sup>A bases in all covered reads under bin/ adenosine

8 bases in all covered reads under bin. And the accessibility score of each single

9 molecule in the bin was also calculated.

10

11 ChIP-seq data processing

12 Demultiplexed fastq files were mapped to the hg19 genome using Bowtie2(2.4.1)<sup>64</sup>with

13 the following settings: bowtie2 --end-to-end --very-sensitive --no-mixed --no-discordant -

14 -phred33 -I 10 -X 700. peaks were called using MACS2 (v.2.1.0)<sup>65</sup> with the following

15 settings: -g 12000000-f BAMPE.

16

17 CUT&TAG data processing

18 Demultiplexed fastq files were mapped to the hg19 genome using Bowtie2 with the

19 following settings: bowtie2 --end-to-end --very-sensitive --no-mixed --no-discordant --

20 phred33 -I 10 -X 700. Because of a constant amount of pATn5 is added to CUT&TAG

21 reactions and brings along a fixed amount of E. coli DNA, we used bowtie2 with the

22 parameters mentioned above to remove E. coli DNA and conduct normalization

1 according to the CUT&TAG tutorial <sup>25</sup>. CUT&TAG peaks were called using SEACR(1.3)  
2 <sup>66</sup> with default parameters.

3

4 RNA-seq analysis

5 RNA-seq expected counts of the MCF-7 cell lines in all replicates were corrected to be  
6 TPM, the mean TPM of all replicates was used as the expression level of each gene for  
7 subsequent analysis.

8

9 Gene single molecular diversity

10 The accessibility of a single molecule in each gene was calculated, and the value in  
11 each gene was sorted from small to large by the gene unit. Then the hierarchical  
12 clustering was performed for the diversity of single molecule accessibility of each gene.  
13 KOBAS3.0 <sup>67</sup> was used for KEGG and GO analysis for each cluster.

14

15 Assess replicate reproducibility

16 To study the reproducibility between replicates, the genome is split into 50 bp bins and  
17 sliding 5bp, then a Pearson correlation of the log<sub>2</sub>-transformed values of m<sup>6</sup>A  
18 methylation ratio in each bin is calculated between replicate datasets.

19

20 SV calling

21 We used NGMLR (v0.2.7) <sup>68</sup> to compare the read of ONT to the human reference  
22 genome of hg19 to get the BAM file for comparison. Then we used samtools (v1.2) to



1 sort the bam files. The sniffles (v1.0.12)<sup>68</sup> with the parameter --genotype -T 8 -S 8 were  
2 then used to call the structural variation on the bam file created in the previous step.

3

#### 4 Co-accessibility assessment

5 To evaluate co-accessibility patterns along the genome, we applied COA as follows.

6 Each chromosome in the genome was split into windows of size  $w$ . For each such

7 window  $(i, i + w)$ , we identified another window  $(j, j + w)$  such that the span  $(i, j, w)$  was

8 covered by  $\geq N$  reads. For each single spanning molecule  $k$ , accessibility scores ( $A$ ) in

9 each bin were then aggregated and binarized as described above. The local co-

10 accessibility matrix between two windows was calculated:

$$11 \quad COA_{i,j,w} = \sum_{i=1}^{n/w} \sum_{j=1}^{n/w} \left( 0.5 - \frac{|A_{i,w} - A_{j,w}|}{A_{i,w} + A_{j,w}} \right) * \left( \frac{|LA_i - LA_j|}{n} + 1 \right)$$

12 where  $n$  is the length of selected region,  $L$  is the location of region.

13

#### 14 Data availability

15 CUT&TAG for H3K27me3 and CTCF as well as Nanopore raw data are available at

16 China National GeneBank (CNGB) with project number of CNP0001299.

17

#### 18 External sequencing datasets.

19 A number of previously published MCF-7 breast cancer datasets were used in this

20 study. ChIP-seq data for CTCF was downloaded from ENCODE with accession

21 ENCSR000DMR, ChIP-seq data for H3K27me3 was downloaded from ENCODE with

1 accession ENCSR761DLU. The RNA-seq data of MCF-7 was download from the Gene  
2 Expression Omnibus (GEO) repository database with the accession number  
3 GSE71862.

4  
5 Other external datasets.

6 Hg19 genome, short interspersed nuclear elements (SINE) and long interspersed  
7 nuclear elements (LINE) region were downloaded from NCBI. TES, TTS and other gene  
8 elements were downloaded from the UCSC Table Browser. MCF-7 CTCF binding site  
9 was downloaded from the CTCFBSDB\_v2.0<sup>69</sup>.

10

## 11 **Acknowledgment**

12 This research was supported by the Science, Technology, and Innovation Commission  
13 of Shenzhen Municipality (grant number JSGG20170824152728492). The supporter had  
14 no role in designing the study, data collection, analysis, and interpretation, or in writing  
15 the manuscript.

16

## 17 **Author contributions**

18 CT designed and supervised the experiments. ZW and FR perform the lab experiments;  
19 WTC and CT perform the bioinformatics data analysis. All others joined the data analysis.

20

## 21 **Competing interest**

22 The authors declare no competing interests.

23

1

2

1

2

- 3 1. What Is Epigenomics? | SpringerLink. (2021).
- 4 2. Toh, T.B., Lim, J.J. & Chow, E.K. Epigenetics in cancer stem cells. *Mol Cancer* **16**,
- 5 29 (2017).
- 6 3. Jiang, Y. et al. Epigenetics in the Nervous System. *The Journal of Neuroscience*
- 7 **28**, 11753-11759 (2008).
- 8 4. Oshima, M. & Iwama, A. Epigenetics of hematopoietic stem cell aging and disease.
- 9 *Int J Hematol* **100**, 326-334 (2014).
- 10 5. Tsompana, M. & Buck, M.J. Chromatin accessibility: a window into the genome.
- 11 *Epigenetics & Chromatin* **7**, 33 (2014).
- 12 6. Voong, L.N., Xi, L., Wang, J.-P. & Wang, X. Genome-wide Mapping of the
- 13 Nucleosome Landscape by Micrococcal Nuclease and Chemical Mapping. *Trends*
- 14 *in Genetics* **33**, 495-507 (2017).
- 15 7. Ryu, Y.B. et al. Biflavonoids from *Torreya nucifera* displaying SARS-CoV 3CL(pro)
- 16 inhibition. *Bioorg Med Chem* **18**, 7940-7947 (2010).
- 17 8. Fejes, A.P. et al. FindPeaks 3.1: a tool for identifying areas of enrichment from
- 18 massively parallel short-read sequencing technology. *Bioinformatics* **24**, 1729-
- 19 1730 (2008).
- 20 9. Wang, Z. et al. Combinatorial patterns of histone acetylations and methylations in
- 21 the human genome. *Nat Genet* **40**, 897-903 (2008).
- 22 10. Shipony, Z. et al. Long-range single-molecule mapping of chromatin accessibility
- 23 in eukaryotes. *Nat Methods* **17**, 319-327 (2020).
- 24 11. Lee, I. et al. Simultaneous profiling of chromatin accessibility and methylation on
- 25 human cell lines with nanopore sequencing. *bioRxiv*, 504993 (2019).
- 26 12. D., K. et al. The Architecture of SARS-CoV-2 Transcriptome. *Cell* **181** (2020).
- 27 13. Shilatifard, A. Chromatin Modifications by Methylation and Ubiquitination:
- 28 Implications in the Regulation of Gene Expression. *Annual Review of Biochemistry*
- 29 **75**, 243-269 (2006).
- 30 14. Mardis, E.R. ChIP-seq: welcome to the new frontier. *Nat Methods* **4**, 613-614
- 31 (2007).
- 32 15. Johnson, D.S., Mortazavi, A., Myers, R.M. & Wold, B. Genome-Wide Mapping of
- 33 in Vivo Protein-DNA Interactions. *Science* **316**, 1497 (2007).
- 34 16. Mikkelsen, T.S. et al. Genome-wide maps of chromatin state in pluripotent and
- 35 lineage-committed cells. *Nature* **448**, 553-560 (2007).
- 36 17. Barski, A. et al. High-resolution profiling of histone methylations in the human
- 37 genome. *Cell* **129**, 823-837 (2007).
- 38 18. Schones, D.E. et al. Dynamic regulation of nucleosome positioning in the human
- 39 genome. *Cell* **132**, 887-898 (2008).
- 40 19. Park, P.J. ChIP-seq: advantages and challenges of a maturing technology. *Nat*
- 41 *Rev Genet* **10**, 669-680 (2009).

- 1 20. Robertson, G. et al. Genome-wide profiles of STAT1 DNA association using  
2 chromatin immunoprecipitation and massively parallel sequencing. *Nat Methods* **4**,  
3 651-657 (2007).
- 4 21. Kharchenko, P.V., Tolstorukov, M.Y. & Park, P.J. Design and analysis of ChIP-seq  
5 experiments for DNA-binding proteins. *Nat Biotechnol* **26**, 1351-1359 (2008).
- 6 22. Valouev, A. et al. Genome-wide analysis of transcription factor binding sites based  
7 on ChIP-Seq data. *Nat Methods* **5**, 829-834 (2008).
- 8 23. Schmidl, C., Rendeiro, A.F., Sheffield, N.C. & Bock, C. ChIPmentation: fast, robust,  
9 low-input ChIP-seq for histones and transcription factors. *Nat Methods* **12**, 963-  
10 965 (2015).
- 11 24. Skene, P.J. & Henikoff, S. An efficient targeted nuclease strategy for high-  
12 resolution mapping of DNA binding sites. *Elife* **6** (2017).
- 13 25. Kaya-Okur, H.S. et al. CUT&Tag for efficient epigenomic profiling of small samples  
14 and single cells. *Nat Commun* **10**, 1930 (2019).
- 15 26. Carter, B. et al. Mapping histone modifications in low cell number and single cells  
16 using antibody-guided chromatin tagmentation (ACT-seq). *Nat Commun* **10**, 3747  
17 (2019).
- 18 27. Harada, A. et al. A chromatin integration labelling method enables epigenomic  
19 profiling with lower input. *Nat Cell Biol* **21**, 287-296 (2019).
- 20 28. Ai, S. et al. Profiling chromatin states using single-cell itChIP-seq. *Nat Cell Biol* **21**,  
21 1164-1172 (2019).
- 22 29. Statham, A.L. et al. Bisulfite sequencing of chromatin immunoprecipitated DNA  
23 (BisChIP-seq) directly informs methylation status of histone-modified DNA.  
24 *Genome Res* **22**, 1120-1127 (2012).
- 25 30. Brinkman, A.B. et al. Sequential ChIP-bisulfite sequencing enables direct genome-  
26 scale investigation of chromatin and DNA methylation cross-talk. *Genome Res* **22**,  
27 1128-1138 (2012).
- 28 31. Lhoumaud, P. et al. EpiMethylTag: simultaneous detection of ATAC-seq or ChIP-  
29 seq signals with DNA methylation. *Genome Biol* **20**, 248 (2019).
- 30 32. Murray, I.A. et al. The non-specific adenine DNA methyltransferase M.EcoGII.  
31 *Nucleic Acids Res* **46**, 840-848 (2018).
- 32 33. van Steensel, B. & Henikoff, S. Identification of in vivo DNA targets of chromatin  
33 proteins using tethered dam methyltransferase. *Nat Biotechnol* **18**, 424-428 (2000).
- 34 34. Douvlataniotis, K., Bensberg, M., Lentini, A., Gylemo, B. & Nestor, C.E. No  
35 evidence for DNA N (6)-methyladenine in mammals. *Sci Adv* **6**, eaay3335 (2020).
- 36 35. O'Brown, Z.K. et al. Sources of artifact in measurements of 6mA and 4mC  
37 abundance in eukaryotic genomic DNA. *BMC Genomics* **20**, 445 (2019).
- 38 36. Simpson, J.T. et al. Detecting DNA cytosine methylation using nanopore  
39 sequencing. *Nat Methods* **14**, 407-410 (2017).
- 40 37. Rand, A.C. et al. Mapping DNA methylation with high-throughput nanopore  
41 sequencing. *Nat Methods* **14**, 411-413 (2017).
- 42 38. Skene, P.J., Henikoff, J.G. & Henikoff, S. Targeted in situ genome-wide profiling  
43 with high efficiency for low cell numbers. *Nature Protocols* **13**, 1006-1019 (2018).
- 44 39. Kaya-Okur, H.S. et al. CUT&Tag for efficient epigenomic profiling of small samples  
45 and single cells. *Nature Communications* **10**, 1930 (2019).

- 1 40. Furey, T.S. ChIP-seq and beyond: new and improved methodologies to detect and  
2 characterize protein-DNA interactions. *Nature Reviews Genetics* **13**, 840-852  
3 (2012).
- 4 41. Kouzarides, T. Chromatin modifications and their function. *Cell* **128**, 693-705  
5 (2007).
- 6 42. Berger, S.L. The complex language of chromatin regulation during transcription.  
7 *Nature* **447**, 407-412 (2007).
- 8 43. Prickaerts, P. et al. Hypoxia increases genome-wide bivalent epigenetic marking  
9 by specific gain of H3K27me3. *Epigenetics & Chromatin* **9**, 46 (2016).
- 10 44. Young, M.D. et al. ChIP-seq analysis reveals distinct H3K27me3 profiles that  
11 correlate with transcriptional activity. *Nucleic Acids Research* **39**, 7415-7427  
12 (2011).
- 13 45. Holwerda, S.J. & de Laat, W. CTCF: the protein, the binding partners, the binding  
14 sites and their chromatin loops. *Philos Trans R Soc Lond B Biol Sci* **368**, 20120369  
15 (2013).
- 16 46. Yin, M. et al. Molecular mechanism of directional CTCF recognition of a diverse  
17 range of genomic sites. *Cell Res* **27**, 1365-1377 (2017).
- 18 47. Disdero, E. & Filée, J. LoRTE: Detecting transposon-induced genomic variants  
19 using low coverage PacBio long read sequences. *Mobile DNA* **8**, 5 (2017).
- 20 48. Pauler, F.M. et al. H3K27me3 forms BLOCs over silent genes and intergenic  
21 regions and specifies a histone banding pattern on a mouse autosomal  
22 chromosome. *Genome Res* **19**, 221-233 (2009).
- 23 49. Román, A.C. et al. Dioxin receptor and SLUG transcription factors regulate the  
24 insulator activity of B1 SINE retrotransposons via an RNA polymerase switch.  
25 *Genome Res* **21**, 422-432 (2011).
- 26 50. Kunarso, G. et al. Transposable elements have rewired the core regulatory  
27 network of human embryonic stem cells. *Nature Genetics* **42**, 631-634 (2010).
- 28 51. Buenrostro, J.D., Wu, B., Chang, H.Y. & Greenleaf, W.J. ATAC-seq: A Method for  
29 Assaying Chromatin Accessibility Genome-Wide. *Curr Protoc Mol Biol* **109**,  
30 21.29.21-21.29.29 (2015).
- 31 52. Klemm, S.L., Shipony, Z. & Greenleaf, W.J. Chromatin accessibility and the  
32 regulatory epigenome. *Nat Rev Genet* **20**, 207-220 (2019).
- 33 53. Vendrell, J.A. et al. ZNF217 is a marker of poor prognosis in breast cancer that  
34 drives epithelial-mesenchymal transition and invasion. *Cancer Res* **72**, 3593-3606  
35 (2012).
- 36 54. Krig, S.R. et al. ZNF217, a candidate breast cancer oncogene amplified at 20q13,  
37 regulates expression of the ErbB3 receptor tyrosine kinase in breast cancer cells.  
38 *Oncogene* **29**, 5500-5510 (2010).
- 39 55. Voigt, P., Tee, W.W. & Reinberg, D. A double take on bivalent promoters. *Genes*  
40 *Dev* **27**, 1318-1338 (2013).
- 41 56. Dunican, D.S. et al. Bivalent promoter hypermethylation in cancer is linked to the  
42 H3K27me3/H3K4me3 ratio in embryonic stem cells. *BMC Biol* **18**, 25 (2020).
- 43 57. Chapman-Rothe, N. et al. Chromatin H3K27me3/H3K4me3 histone marks define  
44 gene sets in high-grade serous ovarian cancer that distinguish malignant, tumour-  
45 sustaining and chemo-resistant ovarian tumour cells. *Oncogene* **32**, 4586-4592  
46 (2013).

- 1 58. Li, F. et al. Bivalent Histone Modifications and Development. *Curr Stem Cell Res Ther* **13**, 83-90 (2018).
- 2
- 3 59. Adams, J. et al. Vascular endothelial growth factor (VEGF) in breast cancer: comparison of plasma, serum, and tissue VEGF and microvessel density and effects of tamoxifen. *Cancer Res* **60**, 2898-2905 (2000).
- 4
- 5
- 6 60. Burger, J.A. & Wiestner, A. Targeting B cell receptor signalling in cancer: preclinical and clinical advances. *Nat Rev Cancer* **18**, 148-167 (2018).
- 7
- 8 61. Schütz, F. et al. PD-1/PD-L1 Pathway in Breast Cancer. *Oncol Res Treat* **40**, 294-297 (2017).
- 9
- 10 62. Hosogane, M., Funayama, R., Shirota, M. & Nakayama, K. Lack of Transcription Triggers H3K27me3 Accumulation in the Gene Body. *Cell Reports* **16**, 696-706 (2016).
- 11
- 12
- 13 63. Hall, I.M.J.B. BEDTools: a flexible suite of utilities for comparing genomic features. **26**, 841 (2010).
- 14
- 15 64. Langmead, B. & Salzberg, S.L.J.N.M. Fast gapped-read alignment with Bowtie 2. **9**, 357-359 (2012).
- 16
- 17 65. Feng, J., Liu, T., Qin, B., Zhang, Y. & Liu, X.S.J.N.P. Identifying ChIP-seq enrichment using MACS. **7**, 1728 (2012).
- 18
- 19 66. Meers, M.P., Tenenbaum, D., Henikoff, S.J.E. & Chromatin Peak calling by Sparse Enrichment Analysis for CUT&RUN chromatin profiling. (2019).
- 20
- 21 67. Chen, X. et al. KOBAS 2.0: a web server for annotation and identification of enriched pathways and diseases. **39**, 316-322 (2011).
- 22
- 23 68. Sedlazeck, F.J. et al. Accurate detection of complex structural variations using single-molecule sequencing. (2018).
- 24
- 25 69. Lei, B., Mi, Z. & Cui, Y.J.N.A.R. CTCFBSDB: a CTCF-binding site database for characterization of vertebrate genomic insulators. **36**, D83-87 (2008).
- 26

27

28

29

30

31

32

33

A

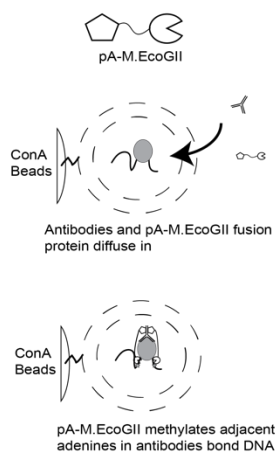

B

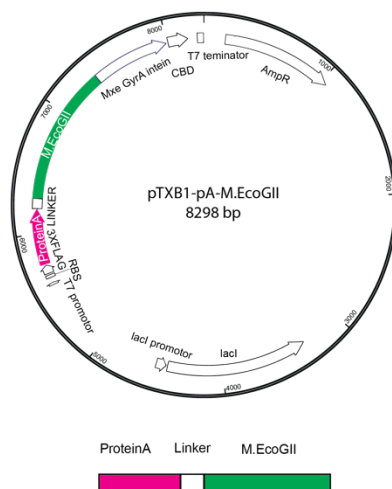

C

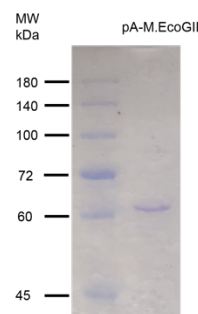

D

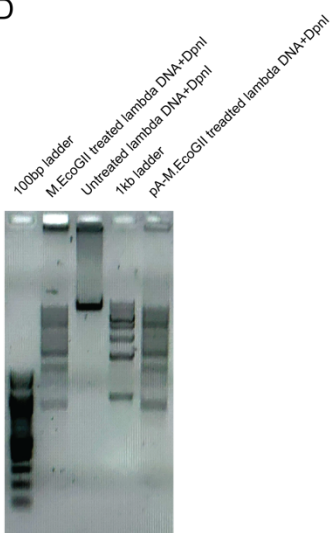

1

2

E

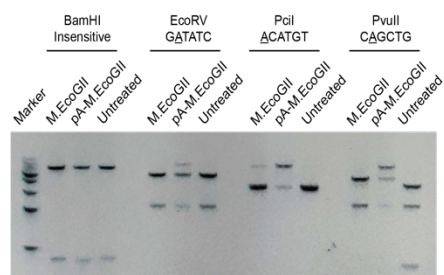

F

| Samples (OD450)  | Dilution 1/120 | Dilution 1/480 |
|------------------|----------------|----------------|
| pA-M.EcoGII      | 2.238          | 1.939          |
| M.EcoGII         | 0.121          | 0.122          |
| Negative control | 0.119          | 0.122          |
| ProteinA         | 0.799          | 0.305          |

G

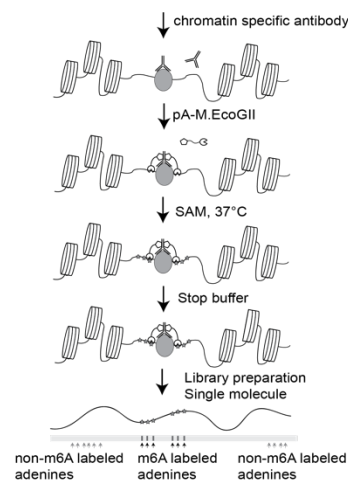



1 **Figure 1. The experiment concept and validation of the recombinant protein pA-**  
2 **M.EcoGII in BIND&MODIFY.** (A) The experiment concept of the BIND&MODIFY. The  
3 cells were lightly fixed and permeabilized for the antibody and enzyme passage. The  
4 recombinant protein pA-M.EcoGII was located to desired sites under antibody guidance.  
5 Then the M.EcoGII activity was locally activated to modify the nearby regions to label  
6 the genomic DNA with targeted binding proteins. (B) The upper panel showed the  
7 plasmid map of the pA-M.EcoGII. The fused pA-M.EcoGII was cloned into pTXB1  
8 plasmid and purified with compatible IMPACT protein purification system. The lower  
9 panel showed the expressed fusion protein structure: Protein A-linker-M.EcoGII-intein-  
10 CBD. (C) The Coomassie blue gel stain showed the purity of the purified protein A-  
11 M.EcoGII. (D) Methylation of linear lambda DNA by pA-M.EcoGII activates m6A-site  
12 dependent DpnI restriction endonuclease digestion. The PCR amplified unmethylated  
13 lambda DNA was treated with commercial M.EcoGII, no enzyme, and pA-M.EcoGII. The  
14 GATC m6A methylation dependent restriction endonuclease DpnI digestion showed the  
15 comparable methyltransferase activity of the commercial M.EcoGII and our recombinant  
16 proteins. DNA marker: 100bp ladder, 100-1510bp(left); 1kb ladder, 250-10,000bp(right).  
17 (E) Methylation of linear dsDNA by pA-M.EcoGII inhibits multiple site-specific  
18 methylation sensitive restriction endonucleases. The unmethylated DNA template was a  
19 7kb linear dsDNA, which was PCR amplified from pTXB1 plasmid. The DNA template  
20 was treated with commercial M.EcoGII, pA-M.EcoGII and no enzyme. These treated  
21 DNA templates were each incubated with four restriction endonucleases (BamHI,  
22 EcoRV, PciI, PvuII). The BamHI is the m6A methylation insensitive enzyme, and the  
23 EcoRV, PciI, PvuII are the m6A methylation sensitive enzyme, with which the digestion

1 could be blocked by corresponding m6A site. Our pA-M.EcoGII recombinant protein  
2 showed digestion inhibition on EcoRV, PciI, PvuII digested samples, better than  
3 commercial M.EcoGII, as compared to untreated DNA template. DNA marker, 1kb  
4 ladder, 250-10,000bp. (F) The antibody affinity assay showed the recombinant pA-  
5 M.EcoGII had the affinity to the secondary antibody in two different dilutions  
6 (1/120, 1/480, 10mg/ml). (G) The experiment outlines of BIND&MODIFY. After light  
7 fixation and permeabilization, the cells were tethered to Concanavalin A magnetic  
8 beads for the purification in the next steps. Then the cells were incubated with antibody  
9 and pA-M.EcoGII with minimal washes. The addition of S-adenosylmethionine to  
10 initialize the methylation reaction. The DNA was extracted to prepare the library for ONT  
11 nanopore sequencing. After sequencing, the data was processed as genome alignment  
12 and m6A base calling.  
13  
14

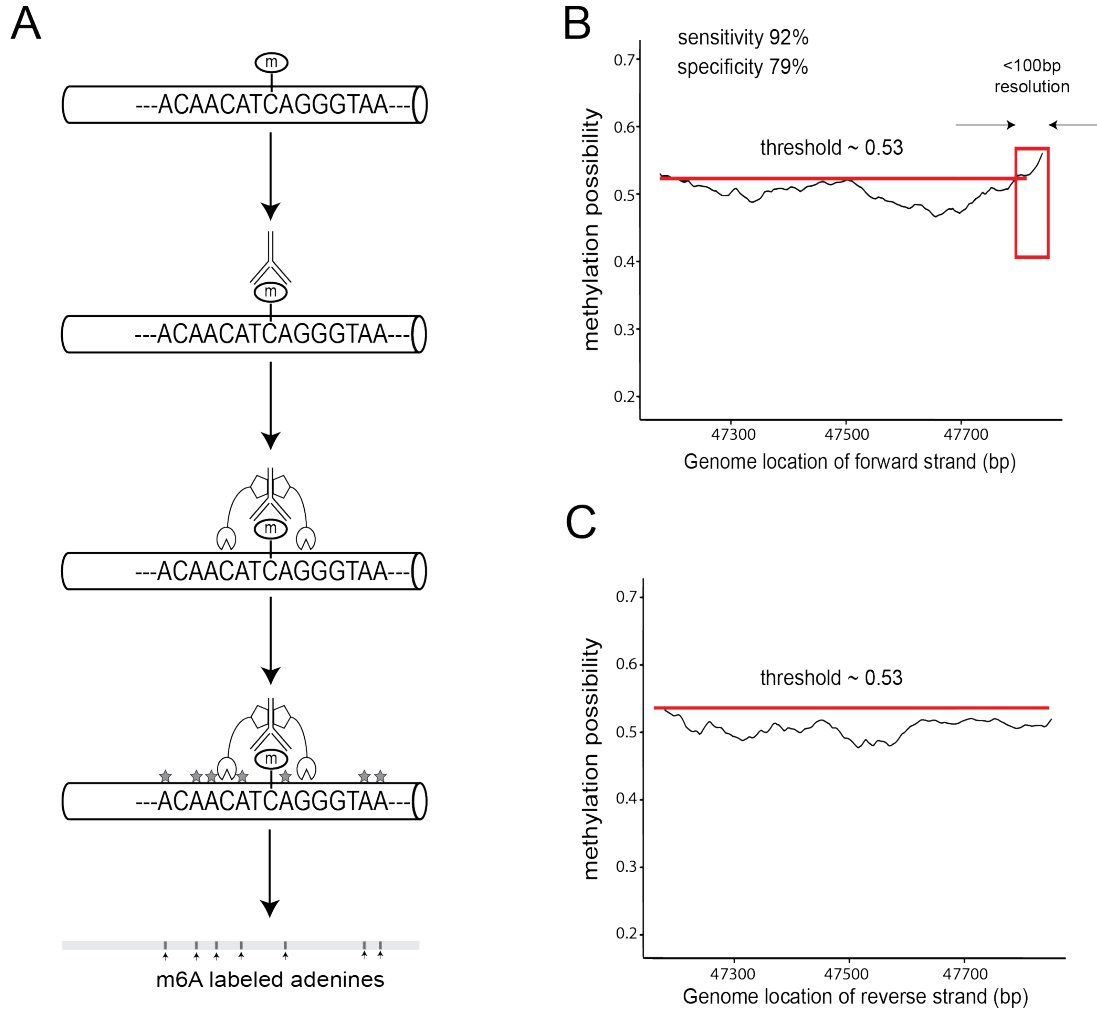

1

2 **Figure 2. The experimental validation of the m6A calling in BIND&MODIFY *in vitro*.**

3 (A) Schematic outline of *in vitro* validation experiment. A fragment of 700bp lambda

4 DNA was amplified by PCR, and 5mC was introduced at 5' end of forward strand only.

5 The 5mC labeled DNA was bound by 5mC antibody and was subsequently treated by

6 BIND&MODIFY method. (B) The m<sup>6</sup>A possibility (Megalodon calling possibility) of

7 forward strand. When the methylation cut-off was set at 0.53 (red line, sensitivity=0.92,

8 specificity=0.79), high methylation possibility region was observed in 3' end at resolution

9 of about 100bp, which was originally marked by 5mC at 3' end. (C) The methylation

- 1 possibility of reverse strand. No high methylation possibility region was observed above
- 2 0.53 cut-off.
- 3

1

A

chr20\_45,609,343-49,644,100\_4028Kb

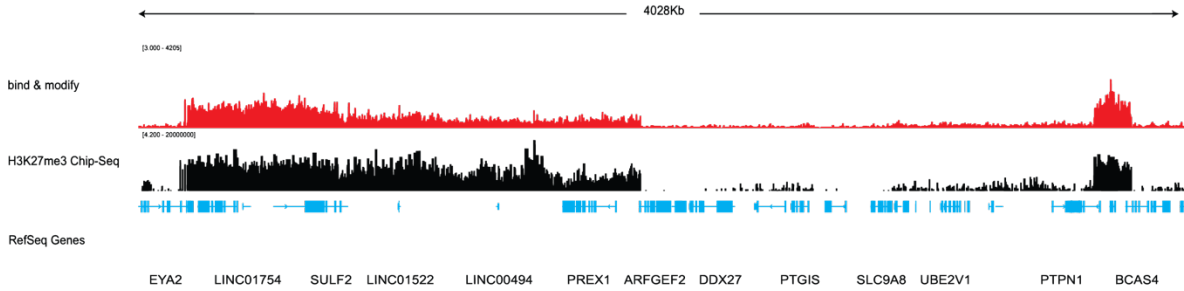

B

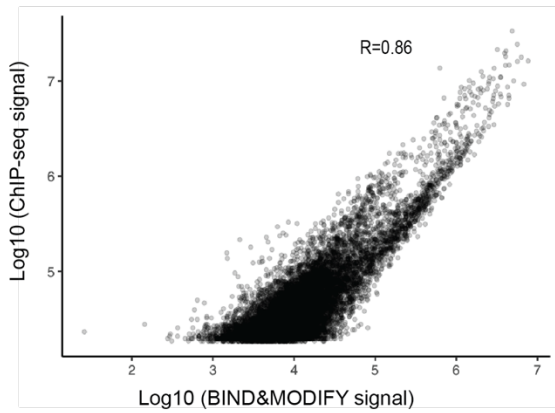

C

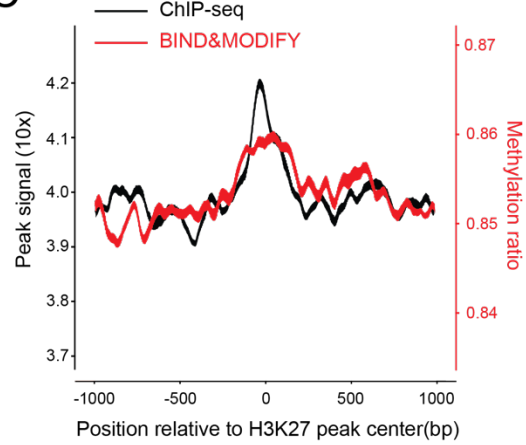

D

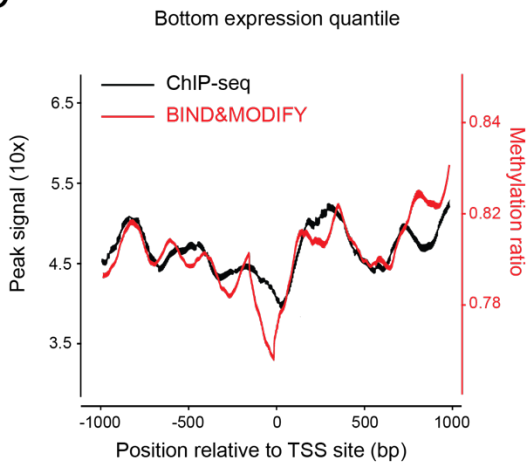

E

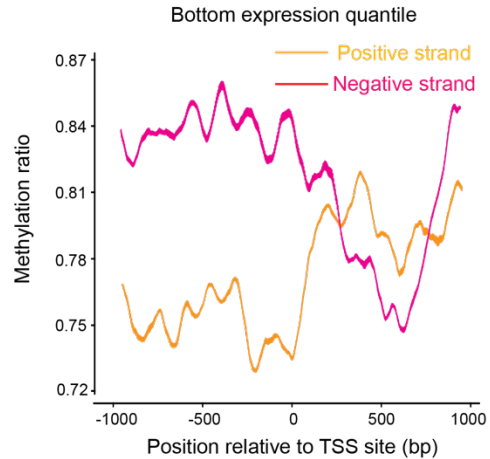

2

1 **Figure 3. The consistency of H3K27me3 pattern between ChIP-seq and**  
2 **BIND&MODIFY in vivo.** (A) The H3K27me3 signal, by BIND&MODIFY and ChIP-seq,  
3 in genome scale view. (B) The scatter plot of BIND&MODIFY signal and ChIP-seq  
4 signal in peak regions. The peak regions are identified H3K27me3 peaks in ChIP-seq.  
5 The BIND&MODIFY signal means the m6A counts and the ChIP-seq signal means the  
6 read counts. (C) The H3K27me3 pattern of BIND&MODIFY methylation ratio and ChIP-  
7 seq signal was plotted by the H3K27me3 peak centered plot (H3K27me3 peaks  
8 identified in ChIP-seq) for all the genes on Chr20. The plot covered the  
9 upstream/downstream 1000bp from H3K27me3 peak center. (D) The H3K27me3  
10 pattern of BIND&MODIFY methylation ratio and ChIP-seq signal was plotted by the TSS  
11 centered plot for the low expression genes. The BIND&MODIFY line was the fitting  
12 curve based on the positive strand and negative strand contribution on each region. The  
13 low expression genes are the genes in the bottom expression quantile. (E) The  
14 H3K27me3 strand-specific view by the TSS centered plot for the low expression genes.  
15

A normalized peak signal resolution  
~0.5

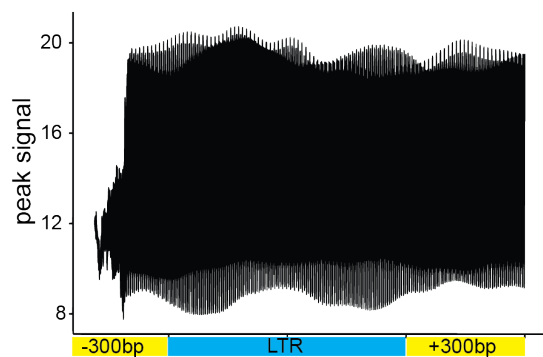

B normalized methylation ratio resolution  
~0.045

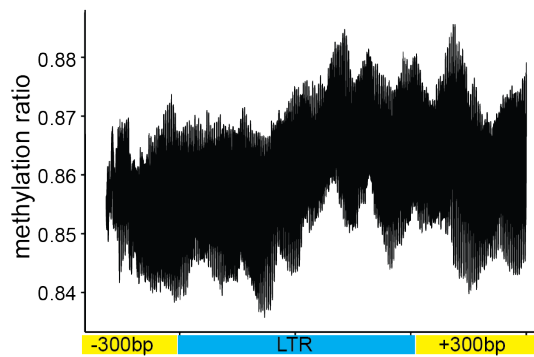

C

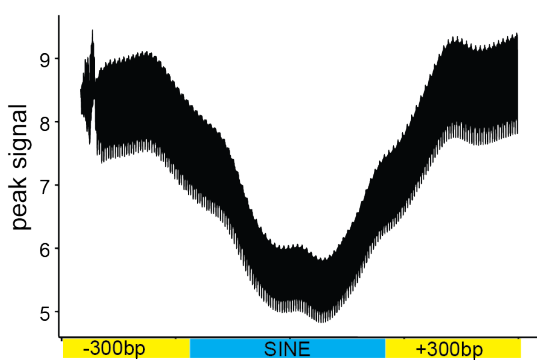

D

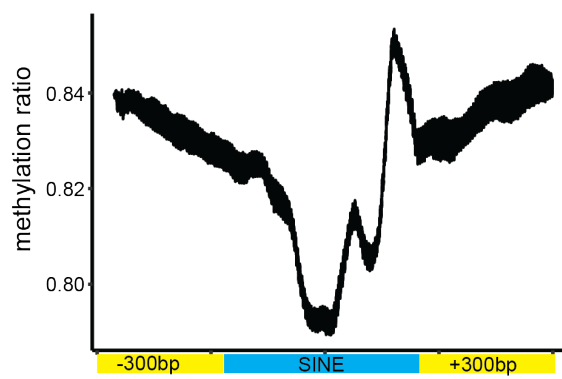

1

2

1 **Figure 4. The BIND&MODIFY resolved H3K27me3 in the transposon areas with**  
2 **higher resolution.** (A-B) The LTRs with size 350~450bp were selected and centered.  
3 The moving average H3K27me3 signals on the upstream/downstream 300bp of these  
4 LTRs, including LTRs, were plotted with corresponding genomic sites. The y-axis (A)  
5 indicated the normalized read counts of CHIP-seq. The y-axis (B) indicated the  
6 normalized methylation ratio of m6A in BIND&MODIFY with nanopore sequencing.  
7 Normalized peak signal resolution is defined by ratio of mean peak signal width  
8 (maximum-minimum) and mean maximum peak signal, which is about 0.5 in CHIP-seq  
9 and 0.045 in BIND&MODIFY. (C-D) The SINEs with size 250~350bp were selected and  
10 centered. The moving average H3K27me3 signal on the upstream/downstream 300bp  
11 of these SINEs, including SINEs, were plotted with corresponding genomic sites. The y-  
12 axis (C) indicated the normalized read counts of short-reads CHIP-seq. The y-axis (D)  
13 indicated the normalized methylation ratio of m6A in BIND&MODIFY with nanopore  
14 sequencing.  
15



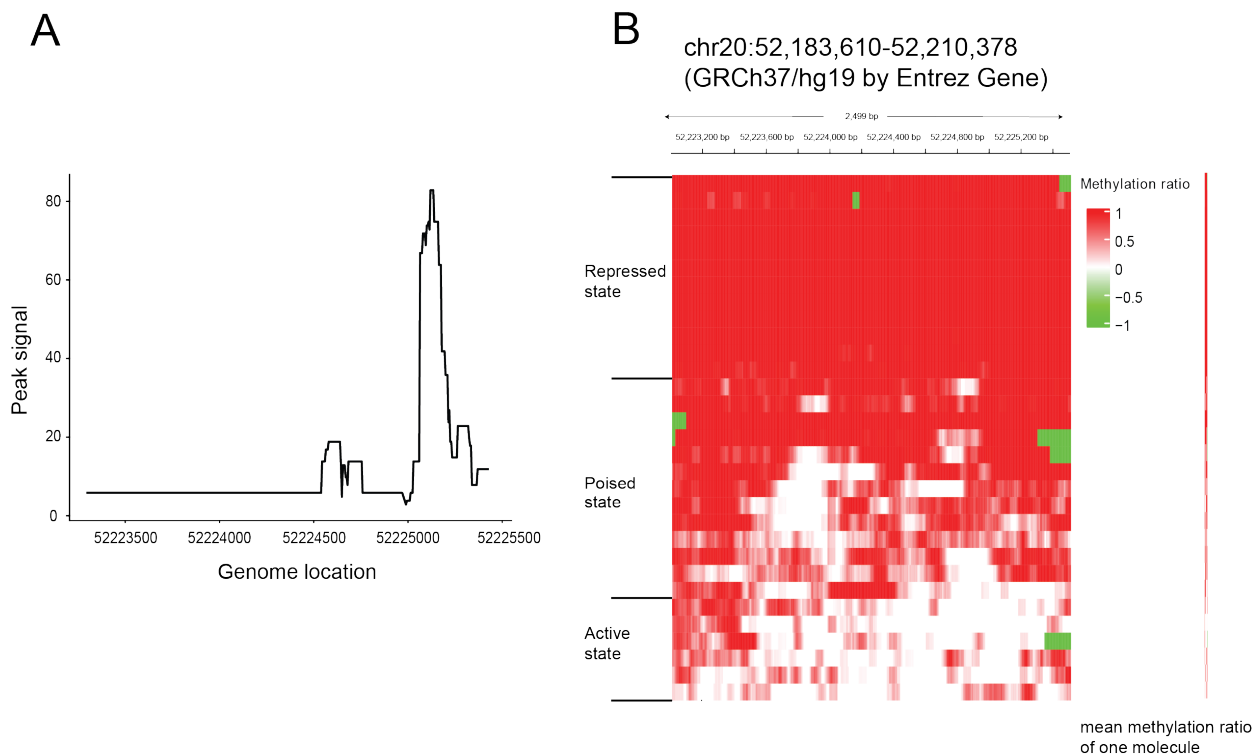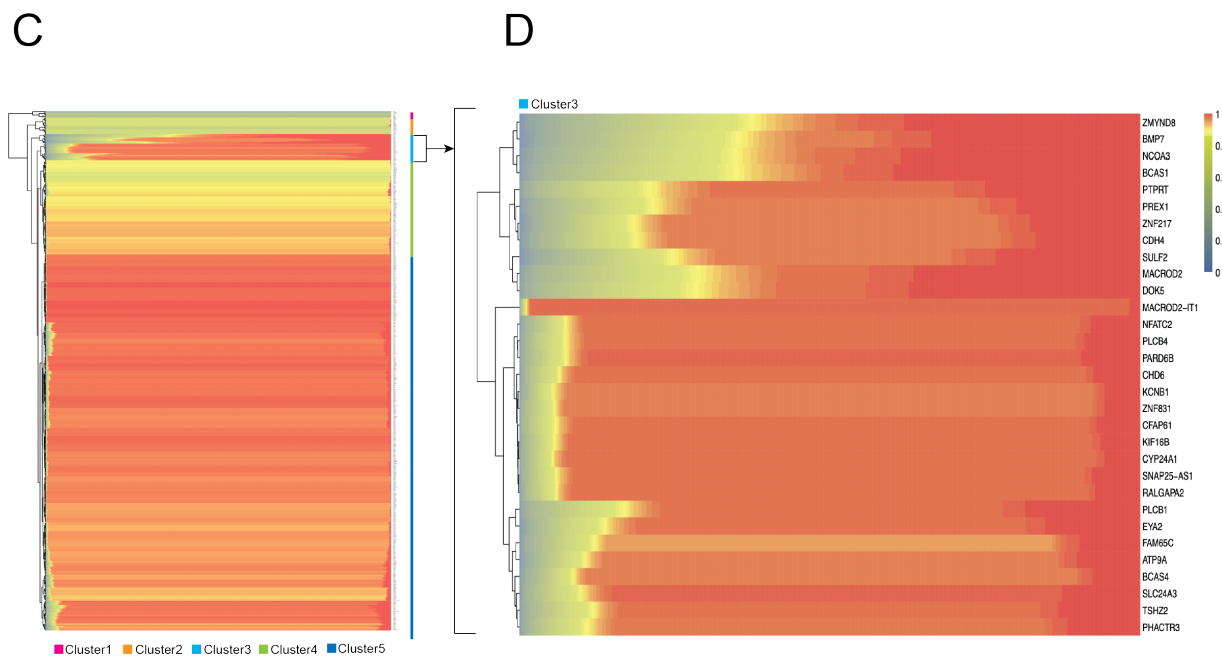

1 **Figure 5. The BIND&MODIFY showed the heterogeneity of H3K27me3 regulation.**  
2 (A) The peak signal of H3K27me3 in ChIP-seq (Chr20:52,183,610-52,210,378). (B) The  
3 single molecular resolution of the positive strand Chr20:52,183,610-52,210,378  
4 visualize each molecular methylation statuses of H3K27me3. The rows in heatmap  
5 represented the different DNA molecules. The color indicated the methylation ratio,  
6 which represented the H3K27me3 signal. The DNA molecules could be classified into  
7 three states: repressed state, poised state, and active state based on their mean  
8 methylation ratio. The right panel is the condensed illustration of individual DNA  
9 molecules mean methylation ratio. Each block on the vertical line (molecule  
10 heterogeneity line) represented the mean methylation of each DNA molecule. (C)  
11 H3K27me3 heterogeneity pattern of genes in chr20. Mean H3K27me3 methylation ratio  
12 of individual DNA molecule was plotted for all the genes on DNA region  
13 (Chr20:52,183,610-52,210,378). Each pixel on each row corresponds to mean  
14 methylation ratio of each individual DNA molecule, and each row corresponds to each  
15 gene. The methylation ratio was ranked from low to high (left to right). (D) The right  
16 heatmap showed the magnified cluster 3 in the left heatmap. Details of H3K27me3  
17 heterogeneity calculation methods can be found in supplementary figure 17.

18

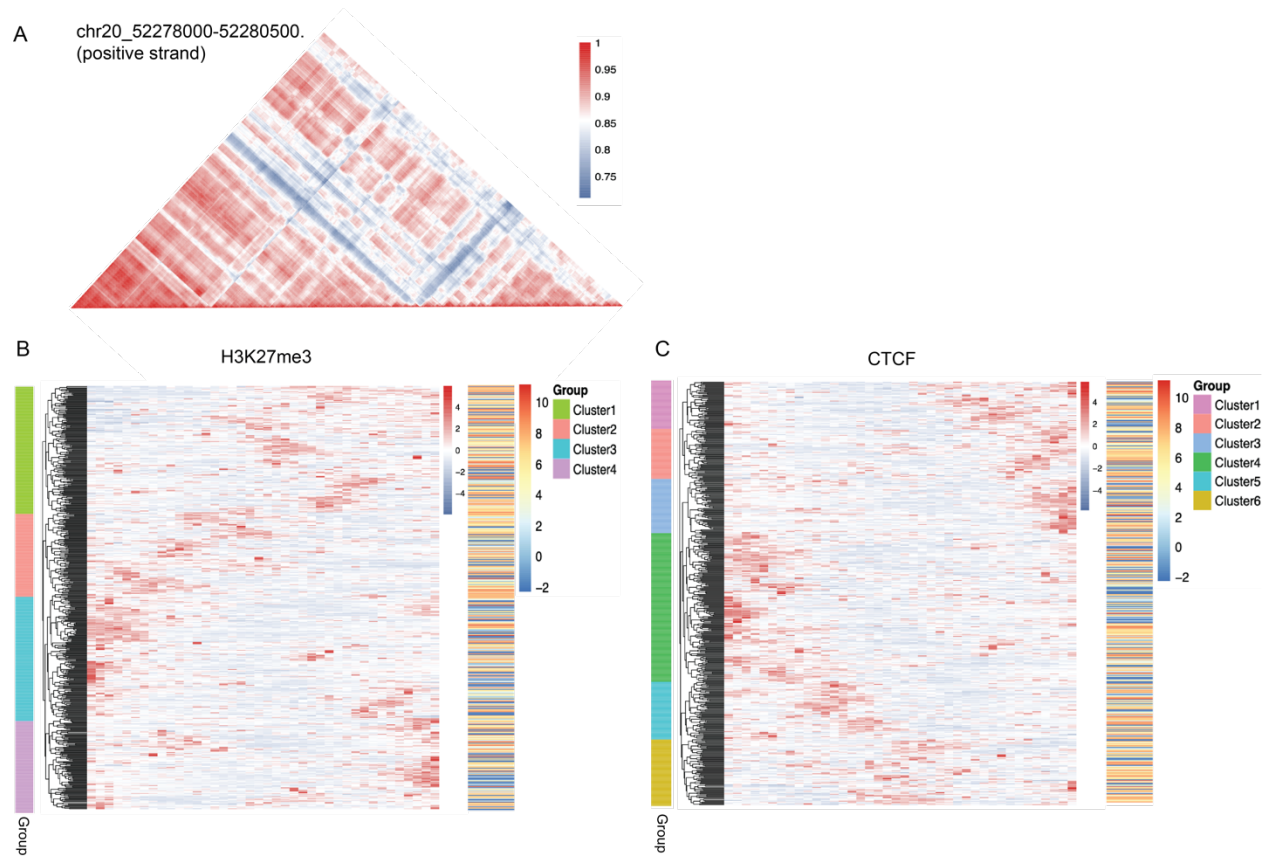

1 **Figure 6. The distance correlation of the epigenetic regulation.** (A) The distance  
2 correlation of the H3K27me3 in chr20: 52278000~52280500 (positive strand). The color  
3 indicated the correlation coefficient (CC) metric among genome regions. The higher CC  
4 metric means the stronger correlation in distance. (B) The global view of the H3K27me3  
5 distance effect (DE) index for all the genetic transcription regions (upstream 2kb of  
6 transcription start site) in chr20. The DE index is sum of the CC\*distance, representing  
7 this location impact on other sites. The red color means the stronger impact on distal  
8 genomic sites. The left color bar indicated the clusters of these transcription regions.  
9 The right color bar indicated the corresponding gene expression. (C) The global view of  
10 the CTCF distance effect for all the genetic transcription in chr20. Details of correlation  
11 coefficient (CC) metric and distance effect (DE) index calculation method can be found  
12 in supplementary figure 21.

13
